# Supplementary material for: Construction of WO3 quantum dots/TiO2 nanowire arrays type II heterojunction via electrostatic self-assembly for efficient solar-driven photoelectrochemical water splitting
Source: Royal Society of Chemistry journal article supplement (doi:10.1039/d3dt00483j), 2023-01-01
Supplement: d3dt00483j1.pdf [file d3dt00483j1.pdf]

**Construction of WO<sub>3</sub> quantum dots / TiO<sub>2</sub> nanowire arrays type II  
heterojunction via electrostatic self-assembly for efficient solar-driven  
photoelectrochemical water splitting**

Ning Zhang <sup>abd#</sup>, Huili Li <sup>c#</sup>, Bo Yao <sup>a</sup>, Shiyan Liu <sup>a</sup>, Jun Ren <sup>a</sup>, Yawei Wang <sup>e</sup>, Zebo Fang <sup>a\*</sup>, Rong  
Wu <sup>bd\*</sup>, Shunhang Wei <sup>a\*</sup>

<sup>a</sup> Zhejiang Engineering Research Center of MEMS, Shaoxing University, Shaoxing 312000, China.

<sup>b</sup> School of Physics Science and Technology, Xinjiang University, Urumqi, Xinjiang 830000, China.

<sup>c</sup> College of Chemistry and Materials Science, Shanghai Normal University, Shanghai 200234, China.

<sup>d</sup> Xinjiang Key Laboratory of Solid State Physics and Devices, Xinjiang University, Urumqi, Xinjiang 830017, China

<sup>e</sup> School of Chemistry and Chemical Engineering, Jiujiang University, Jiujiang 332005, China

E-mail: csfzb@usx.edu.cn; wurongxju@sina.com; wshusx@163.com

# Equal contributions.

### **Characterization**

The crystalline phases of the prepared samples were examined by a DX-2700BH X-ray powder diffractometer (XRD). The morphology was recorded by a field emission scanning electron microscope (FESEM, SIGMA 300) and a high-resolution transmission electron microscope (HRTEM, JEM-2100F) equipped with an energy dispersive X-ray spectrometer (EDS). The elemental chemical states of the samples were examined using an X-ray photoelectron spectroscopy (XPS, Thermo Scientific K-Alpha) with a monochromatic Al K $\alpha$  source (1486.6 eV). All the binding energies were calibrated using the C1s peak at 284.8 eV as the reference. The diffuse reflection spectra (DRS) of the samples were recorded using a scan UV-vis spectrophotometer (Shimadzu UV-3600 plus) equipped with an integrating sphere assembly, and BaSO<sub>4</sub> was used as the reference.

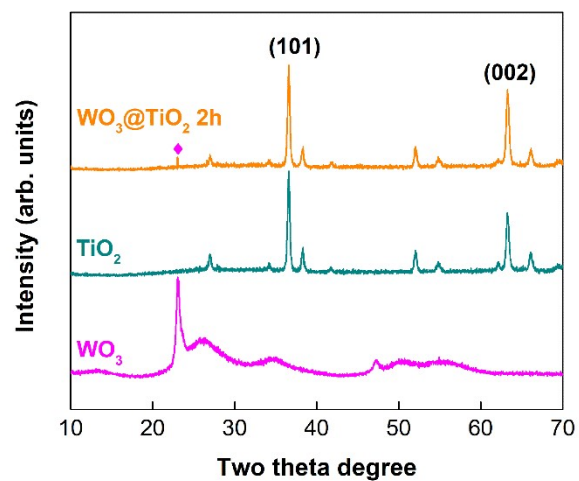

Fig. S1 XRD pattern of the as-prepared samples.

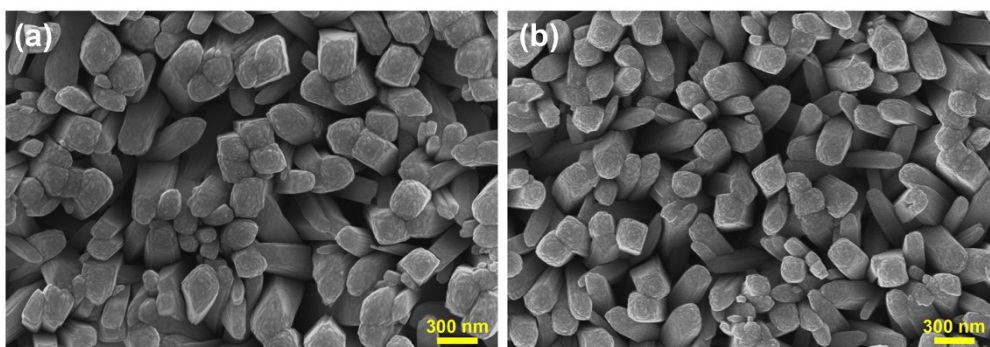

Fig. S2 FESEM images (top view) of the (a)  $TiO_2$  nanowire arrays and (b)  $WO_3@TiO_2$  2h samples.

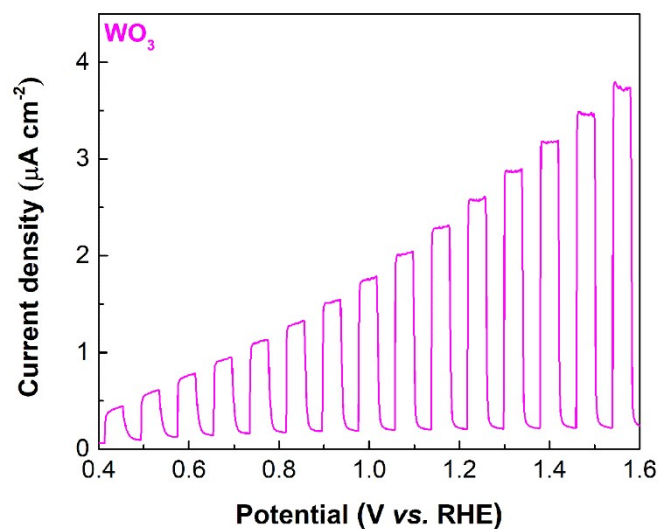

Fig. S3 Photocurrent density-potential curves of the WO<sub>3</sub> electrode.

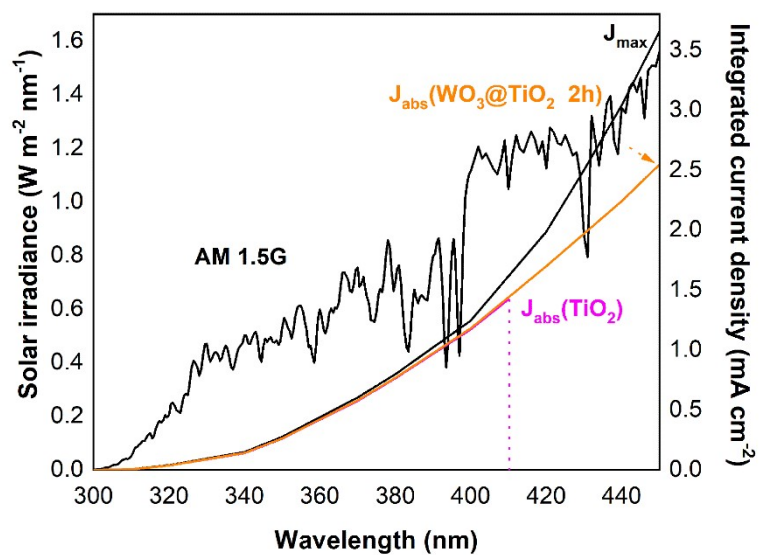

Figure S4.  $J_{\max}$  and  $J_{\text{abs}}$  of the TiO<sub>2</sub> and WO<sub>3</sub>@TiO<sub>2</sub> 2h electrodes under AM 1.5G irradiation.  $J_{\max}$  curve is calculated using a trapezoidal integration of AM 1.5G spectrum. The  $J_{\text{abs}}$  curve was obtained via multiply the AM 1.5G solar spectrum with absorption spectrum and then integrate.

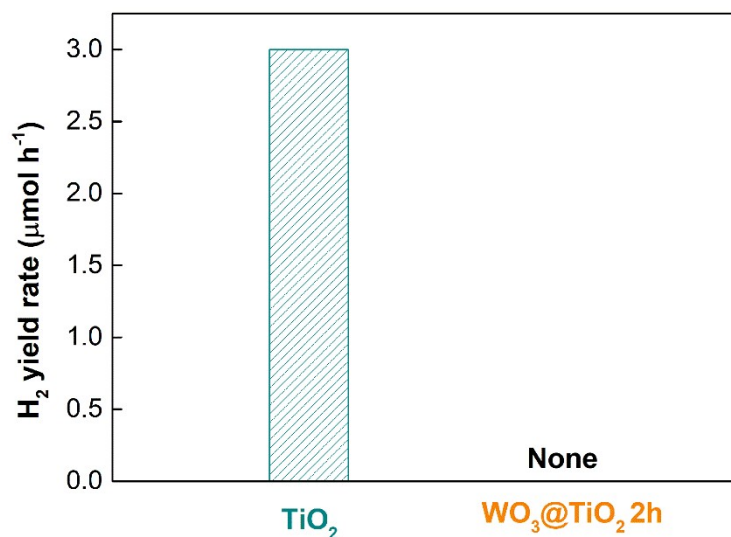

Fig.S5 Photocatalytic performance of different electrodes (methanol (10 vol.%) as sacrificial agent; 300W Xenon lamp; photodeposition of Pt (2 wt.%)).

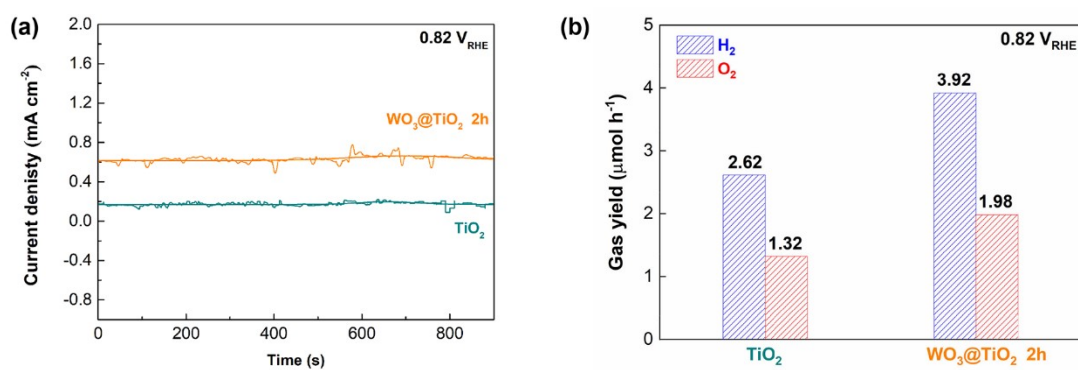

Fig. S6 (a) Steady-state photocurrent density at 0.2 V vs. Ag/AgCl (0.82 V vs. RHE) for the TiO<sub>2</sub> and WO<sub>3</sub>@TiO<sub>2</sub> 2h photoanodes; (b) Photoelectrocatalytic overall water splitting with the TiO<sub>2</sub> and WO<sub>3</sub>@TiO<sub>2</sub> 2h as photoanodes at 0.2 V vs. Ag/AgCl (0.82 V vs. RHE).

Table S1 Summary of PEC performance of WO<sub>3</sub>-based and TiO<sub>2</sub>-based photoanodes

| Photoanode                                            | Light                                       | Photocurrent density at 1.23 V <sub>RHE</sub> (mA cm <sup>-2</sup> ) | H <sub>2</sub> yield rate (μmol h <sup>-1</sup> ) at 1.23 V <sub>RHE</sub> | O <sub>2</sub> yield rate (μmol h <sup>-1</sup> ) at 1.23 V <sub>RHE</sub> | Ref.             |
|-------------------------------------------------------|---------------------------------------------|----------------------------------------------------------------------|----------------------------------------------------------------------------|----------------------------------------------------------------------------|------------------|
| γ-graphyne/TiO <sub>2</sub>                           | AM1.5 G<br>(100 mW cm <sup>-2</sup> )       | 0.75                                                                 | /                                                                          | /                                                                          | 1                |
| WO <sub>3</sub> /TiO <sub>2</sub> nanoplates          | AM1.5 G<br>(100 mW cm <sup>-2</sup> )       | 0.25                                                                 | /                                                                          | /                                                                          | 2                |
| TiO <sub>2</sub> @g-CN nanorods arrays                | AM1.5 G<br>(100 mW cm <sup>-2</sup> )       | 0.91                                                                 | /                                                                          | /                                                                          | 3                |
| WO <sub>3</sub> @α-Fe <sub>2</sub> O <sub>3</sub>     | AM1.5 G<br>(100 mW cm <sup>-2</sup> )       | 1.66                                                                 | /                                                                          | /                                                                          | 4                |
| WO <sub>3-x</sub> @TiO <sub>2-x</sub>                 | 500 W Xe lamp<br>(100 mW cm <sup>-2</sup> ) | ~3.2                                                                 | 56                                                                         | 27                                                                         | 5                |
| TiO <sub>2</sub> /BiVO <sub>4</sub> /SnO <sub>2</sub> | AM1.5 G<br>(100 mW cm <sup>-2</sup> )       | ~2.3                                                                 | /                                                                          | /                                                                          | 6                |
| WO <sub>3-x</sub> /TiO <sub>2</sub>                   | 300 W Xe lamp<br>(320 mW cm <sup>-2</sup> ) | 4.16                                                                 | 69.6<br>(1.2 V <sub>RHE</sub> )                                            | ~34.8<br>(1.2 V <sub>RHE</sub> )                                           | 7                |
| BN ZnO/TiO <sub>2</sub>                               | AM1.5 G<br>(100 mW cm <sup>-2</sup> )       | 2.75                                                                 | 45.6                                                                       | 21.8                                                                       | 8                |
| α-Fe <sub>2</sub> O <sub>3</sub> /Au/TiO <sub>2</sub> | AM1.5 G<br>(100 mW cm <sup>-2</sup> )       | 1.05                                                                 | 18.67                                                                      | 9.24                                                                       | 9                |
| <b>WO<sub>3</sub>@TiO<sub>2</sub> 2h</b>              | AM1.5 G<br>(100 mW cm <sup>-2</sup> )       | <b>~1.5</b>                                                          | <b>14.42</b>                                                               | <b>7.25</b>                                                                | <b>This work</b> |

## Reference

1. D. Qiu, C. He, Y. Lu, Q. Li, Y. Chen and X. Cui, *Dalton T.*, 2021, **50**, 15422-15432.
2. K. I. Liu and T. P. Perng, *ACS Appl. Energy Mater.*, 2020, **3**, 4238-4244.
3. L. Wang, R. Wang, L. Feng and Y. Liu, *J. Am. Ceram. Soc.*, 2020, **103**, 6272-6279.
4. Y. Li, L. Zhang, R. Liu, Z. Cao, X. Sun, X. Liu and J. Luo, *ChemCatChem*, 2016, **8**, 2765-2770.
5. K. Yuan, Q. Cao, H.-L. Lu, M. Zhong, X. Zheng, H.-Y. Chen, T. Wang, J.-J. Delaunay, W.

- Luo and L. Zhang, *J. Mater. Chem. A*, 2017, **5**, 14697-14706.
6. S. W. Hwang, J. U. Kim, J. H. Baek, S. S. Kalanur, H. S. Jung, H. Seo and I. S. Cho, *J. Alloy. Compd.*, 2019, **785**, 1245-1252.
  7. S. Lin, H. Ren, Z. Wu, L. Sun, X.-G. Zhang, Y.-M. Lin, K. H. Zhang, C. J. Lin, Z. Q. Tian and J. F. Li, *J. Energy Chem.*, 2021, **59**, 721-729.
  8. T. Zhou, J. Wang, S. Chen, J. Bai, J. Li, Y. Zhang, L. Li, L. Xia, M. Rahim and Q. Xu, *Appl. Catal. B: Environ.*, 2020, 267, 118599.
  9. Y. Fu, C. L. Dong, W. Zhou, Y. R. Lu, Y. C. Huang, Y. Liu, P. Guo, L. Zhao, W. C. Chou and S. Shen, *Appl. Catal. B: Environ.*, 2020, 260, 118206.
